# Supplementary material for: Zebra mussel beds: an effective feeding ground for Ponto-Caspian gobies or suitable shelter for their prey?
Source: PeerJ. 2016 Nov 15;4:e2672. doi: 10.7717/peerj.2672 (PMC5119280; doi:10.7717/peerj.2672)
Supplement: Supplemental Information 1 [file peerj-04-2672-s001.xlsx]

## Sheet: Exp1
Experiment 1 (one dish with substratum in a tank)						(Table 2A, B)
	Numbers of consumed larvae
	substratum	stones	sand	Dreissena	Dreissena	Dreissena	Dreissena	Dreissena
	food quantity (no. larvae)	8	8	8	12	16	24	32
Fish size (cm)	Fish species (RG - racer goby, WTG - western tubenose goby)
4	RG	5	8	3	6	6	8	12
4.38	RG	1	1	3	4	0	11	17
4.47	RG	0	8	0	0	4	3	4
4.67	RG	5	7	2	2	6	14	13
4.74	RG	3	8	1	4	7	6	13
4.78	RG	4	5	6	1	4	9	17
4.8	RG	2	0	2	0	4	5	12
4.81	RG	8	8	7	10	14	20	22
5.085	RG	0	7	2	6	2	0	4
5.16	RG	8	8	5	10	15	8	20
5.21	RG	1	6	3	11	12	9	12
5.21	RG	2	6	4	4	16
5.27	RG	6	6	4	0	6	2	7
5.34	RG	8	8	7	9	14	8	14
5.36	RG	8	8	6	11	16	14	23
5.37	RG	4	7	5	6	8	9	13
5.39	RG	6	8	6	7	10	10	15
5.43	RG	0	1	3	0	1
5.51	RG	3	8	3	9	5	14	16
5.53	RG	7	8	4	4	6	10	17
5.65	RG	4	8	4	6	14
5.69	RG	7	8	4	6	13	11	10
5.97	RG	1	1	0	4	2
6.11	RG	5	8	3	2	7	6	15
6.2	RG	0	8	7	3	9
6.38	RG	6	8	7	0	12
6.66	RG	4	0	6	0	14
6.78	RG	1	8	1	4	7
6.84	RG	4	8	3	7	15
6.87	RG	1	7	2	9	7
6.88	RG	6	8	4	8	16
7.2	RG	5	8	7	10	16
7.38	RG	5	8	7	8	16
7.83	RG	0	8	3	5	13
8.4	RG	6	8	3	2	14
3.69	WTG	3	0	6	5	3	6	14
4.19	WTG	4	7	4	1	8	5	11
4.42	WTG	0	8	5	5	12	17	26
4.53	WTG	4	6	2	11	12	12	17
4.56	WTG	8	6	8	11	12	18	25
4.58	WTG	1	8	5	4	8	14	17
4.68	WTG	2	8	0	8	9	5	15
4.71	WTG	6	7	4	2	11	19	24
4.72	WTG	7	8	6	5	12	17	19
4.75	WTG	8	7	4	6	12	20	25
4.83	WTG	3	7	1	5	11	18	24
5.07	WTG	1	8	3	4	11	19	18
5.1	WTG	3	8	6	8	12	18	15
5.16	WTG	6	8	4	5	10	13	28
5.18	WTG	1	6	3	1	5	16	17
5.25	WTG	6	3	1	1	10	18	4
5.43	WTG	8	8	5	7	10	16	20
5.46	WTG	6	5	1	0	8	24	23
5.49	WTG	3	6	3	4	7	7	18
5.52	WTG	4	8	7	9	9	17	25
5.52	WTG	1	7	4	6	15	23	28
5.57	WTG	0	8	2	3	1	3	3
5.68	WTG	0	1	4	5	4	14	17
5.75	WTG	3	8	6	9	8	13	20
5.81	WTG	1	8	4	4	8	8	5
5.85	WTG	5	8	7	6	12	22	27
5.87	WTG	6	4	4	10	14	20	27
5.92	WTG	1	8	1	3	0	0	0
6.1	WTG	8	7	7	10	13	21	23
6.13	WTG	8	8	5	11	9	17	24
6.15	WTG	7	7	3	11	15	24	31
6.4	WTG	6	8	8	10	12	21	29
6.51	WTG	8	8	6	12	13	11	26
6.64	WTG	2	8	4	9	15	20	31
6.88	WTG	0	8	1	2	2	8	11
6.96	WTG	0	0	0	5	14	18	21
7.28	WTG	6	8	3	11	15	23	23
7.35	WTG	2	8	4	0	0	5	5
7.41	WTG	7	8	4	8	10	20	22

## Sheet: Exp2a
Experiment 2 (two dishes with diferent substrata in a tank)							(Table 3, 4)												(Table 6)
		Time spent in the dish (% of the total time)																	Number of larvae collected from the dish)
		Treatment 1		Treatment 2		Treatment 3		Treatment 4		Treatment 5		Treatment 6		Treatment 7		Treatment 8			Treatment 1		Treatment 2		Treatment 3		Treatment 4		Treatment 5		Treatment 6		Treatment 7		Treatment 8
	substratum	Dish 1	Dish 2	Dish 1	Dish 2	Dish 1	Dish 2	Dish 1	Dish 2	Dish 1	Dish 2	Dish 1	Dish 2	Dish 1	Dish 2	Dish 1	Dish 2		Dish 1	Dish 2	Dish 1	Dish 2	Dish 1	Dish 2	Dish 1	Dish 2	Dish 1	Dish 2	Dish 1	Dish 2	Dish 1	Dish 2	Dish 1	Dish 2
		Stones	Dreissena	Stones	Dreissena	Stones	Dreissena	Stones	Dreissena	Sand	Dreissena	Sand	Dreissena	Sand	Dreissena	Sand	Dreissena		Stones	Dreissena	Stones	Dreissena	Stones	Dreissena	Stones	Dreissena	Sand	Dreissena	Sand	Dreissena	Sand	Dreissena	Sand	Dreissena
	food quantity (no. larvae)	8	8	8	12	8	16	8	24	8	8	8	12	8	16	8	24		8	8	8	12	8	16	8	24	8	8	8	12	8	16	8	24
Fish size (cm)	Fish species (RG - racer goby, WTG - western tubenose goby)
6.88	RG	0	0	0	28.3333	0	63.3333	5	31.6667	6.66667	6.66667	0	0	8.33333	60	10	53.3333		0	0	0	7	0	12	1	20	7	2	1	1	8	8	7	16
7.2	RG	0	0	0	0	8.33333	21.6667	3.33333	0	11.6667	0	5	8.33333	11.6667	6.66667	8.33333	28.3333		0	2	0	3	5	6	0	1	8	1	8	7	8	9	7	15
5.43	RG	0	1.66667	0	0	0	0	0	13.3333	0	0	0	0	5	0	15	11.6667		0	1	0	2	1	0	0	9	4	0	0	0	7	3	7	5
6.87	RG	25	18.3333	20	25	26.6667	36.6667	43.3333	33.3333	26.6667	6.66667	13.3333	31.6667	8.33333	38.3333	13.3333	46.6667		4	3	7	4	5	10	7	14	8	0	8	9	8	13	7	19
5.65	RG	0	0	0	6.66667	21.6667	26.6667	35	31.6667	20	46.6667	15	35	11.6667	51.6667	20	50		0	1	3	5	5	13	5	17	8	5	8	9	8	15	8	19
8.4	RG	0	41.6667	0	11.6667	3.33333	38.3333	6.66667	43.3333	63.3333	0	11.6667	38.3333	15	53.3333	25	46.6667		0	3	1	5	0	10	1	16	8	1	8	0	8	13	8	18
6.38	RG	20	18.3333	3.33333	11.6667	11.6667	20	18.3333	43.3333	6.66667	30	6.66667	21.6667	16.6667	55	10	35		3	2	5	10	0	13	4	17	8	6	6	6	8	16	8	14
6.78	RG	0	6.66667	0	51.6667	26.6667	40	0	80	6.66667	20	11.6667	45	20	51.6667	11.6667	60		0	6	0	10	0	12	0	23	7	7	8	9	8	10	8	20
7.38	RG	35	35	28.3333	38.3333	15	45	26.6667	53.3333	26.6667	48.3333	13.3333	55	13.3333	63.3333	10	56.6667		6	8	7	8	5	15	7	20	8	7	8	10	8	12	8	16
5.97	RG	3.33333	18.3333	21.6667	21.6667	33.3333	33.3333	28.3333	36.6667	31.6667	23.3333	26.6667	28.3333	31.6667	43.3333	16.6667	28.3333		0	3	3	7	1	8	5	17	8	2	8	5	7	10	5	0
6.66	RG	5	3.33333	0	5	5	20	15	28.3333	11.6667	15	8.33333	3.33333	11.6667	21.6667	6.66667	40		1	0	0	0	3	9	2	17	7	4	8	2	8	9	8	18
5.21	RG	8.33333	6.66667	0	6.66667	15	36.6667	6.66667	21.6667	18.3333	38.3333	21.6667	16.6667	13.3333	46.6667	8.33333	35		2	6	0	4	0	12	1	17	8	6	7	6	8	14	6	20
6.2	RG	0	30	0	0	10	10	8.33333	26.6667	33.3333	15	8.33333	21.6667	5	43.3333	21.6667	43.3333		0	1	0	3	4	11	3	19	8	6	8	11	8	15	7	20
7.83	RG	0	0	1.66667	6.66667	25	26.6667	11.6667	51.6667	21.6667	43.3333	33.3333	25	25	43.3333	31.6667	40		0	1	2	9	2	12	2	15	8	7	8	9	8	14	8	21
6.84	RG	15	10	13.3333	11.6667	0	13.3333	15	43.3333	23.3333	15	5	8.33333	13.3333	35	8.33333	35		0	6	0	6	0	13	2	16	8	4	7	4	8	13	6	19
4.8	RG	40	41.6667	50	18.3333	20	53.3333	6.66667	80	25	48.3333	15	68.3333	11.6667	66.6667	15	61.6667		8	7	6	11	5	12	4	20	8	7	8	8	8	14	8	8
5.51	RG	56.6667	10	36.6667	36.6667	33.3333	31.6667	16.6667	65	36.6667	6.66667	40	1.66667	35	0	53.3333	8.33333		7	5	7	6	6	10	0	21	8	2	8	0	8	2	8	2
4.47	RG	23.3333	60	30	23.3333	21.6667	18.3333	18.3333	61.6667	5	15	8.33333	21.6667	18.3333	43.3333	23.3333	18.3333		5	4	5	8	1	8	1	11	6	1	8	5	7	6	8	8
4.67	RG	43.3333	1.66667	51.6667	13.3333	43.3333	30	0	98.3333	70	5	98.3333	0	93.3333	0	28.3333	48.3333		8	0	5	1	6	6	0	15	7	1	8	1	8	3	8	1
5.37	RG	0	0	0	0	0	0	36.6667	0	21.6667	0	20	0	13.3333	0	45	0		0	0	0	0	0	1	3	2	7	0	8	0	7	0	8	11
4.78	RG	28.3333	28.3333	21.6667	16.6667	26.6667	33.3333	13.3333	35	13.3333	5	6.66667	10	13.3333	11.6667	10	20		2	3	3	8	1	10	7	15	8	1	7	6	6	6	8	15
4.81	RG	56.6667	0	65	5	80	0	61.6667	18.3333	21.6667	3.33333	46.6667	6.66667	93.3333	1.66667	80	0		6	0	7	0	8	1	4	7	8	2	8	0	8	2	8	0
5.27	RG	20	36.6667	33.3333	36.6667	18.3333	71.6667	11.6667	70	73.3333	0	46.6667	23.3333	53.3333	6.66667	53.3333	3.33333		2	6	1	7	0	15	4	15	8	0	8	4	8	1	8	1
5.36	RG	11.6667	5	10	8.33333	15	16.6667	10	33.3333	8.33333	0	0	0	8.33333	5	1.66667	10		4	5	1	6	1	8	0	12	6	0	6	0	8	4	6	8
4	RG	73.3333	1.66667	6.66667	25	8.33333	30	6.66667	41.6667	31.6667	0	21.6667	0	31.6667	1.66667	31.6667	13.3333		4	1	4	11	5	10	0	18	8	2	8	0	8	0	8	6
4.74	RG	35	38.3333	28.3333	33.3333	21.6667	51.6667	31.6667	31.6667	6.66667	13.3333	11.6667	13.3333	13.3333	13.3333	16.6667	30		6	8	7	7	6	12	0	20	8	4	8	7	8	5	8	12
5.69	RG	61.6667	6.66667	53.3333	3.33333	11.6667	13.3333	10	40	3.33333	91.6667	0	3.33333	6.66667	10	3.33333	16.6667		2	4	1	6	5	13	0	15	3	3	6	4	8	3	7	12
5.09	RG	0	13.3333	35	10	0	35	10	71.6667	38.3333	16.6667	0	21.6667	50	10	31.6667	40		0	2	2	7	8	4	1	19	8	1	7	4	8	1	8	9
5.53	RG	25	15	13.3333	21.6667	11.6667	45	10	40	15	31.6667	5	3.33333	3.33333	36.6667	11.6667	38.3333		5	3	3	10	1	10	3	19	7	3	8	6	8	9	8	18
5.21	RG	33.3333	3.33333	6.66667	13.3333	13.3333	15	0	28.3333	10	0	13.3333	0	46.6667	6.66667	16.6667	0		2	3	0	3	2	9	1	12	7	1	8	2	8	4	8	0
5.39	RG	28.3333	45	15	13.3333	20	56.6667	41.6667	23.3333	6.66667	13.3333	5	15	13.3333	45	18.3333	21.6667		5	6	6	9	4	15	3	16	8	6	8	6	8	11	8	5
5.16	RG	50	10	10	10	15	25	10	23.3333	23.3333	0	10	1.66667	26.6667	5	25	8.33333		7	3	1	6	2	13	2	18	8	3	8	1	8	3	8	11
4.38	RG	28.3333	30	15	50	33.3333	38.3333	5	33.3333	13.3333	11.6667	8.33333	13.3333	10	20	13.3333	26.6667		2	5	4	8	2	14	0	19	7	2	7	5	8	9	8	12
6.11	RG	70	13.3333	10	41.6667	23.3333	38.3333	23.3333	35	13.3333	0	5	0	16.6667	1.66667	36.6667	0		5	4	8	10	5	13	2	14	8	0	8	2	8	4	8	1
5.34	RG	41.6667	6.66667	31.6667	15	15	31.6667	5	35	0	0	3.33333	3.33333	3.33333	0	11.6667	0		2	6	1	7	1	12	2	18	1	1	2	4	8	0	8	0
3.69	WTG	8.33333	36.6667	36.6667	31.6667	18.3333	41.6667	15	51.6667	20	30	20	30	21.6667	23.3333	16.6667	20		0	0	3	4	0	6	0	6	8	1	8	1	8	0	8	5
4.56	WTG	23.3333	35	10	50	10	76.6667	16.6667	53.3333	16.6667	28.3333	18.3333	53.3333	11.6667	58.3333	11.6667	58.3333		0	5	0	10	0	13	2	11	8	1	7	10	8	2	8	11
5.07	WTG	28.3333	51.6667	45	38.3333	8.33333	75	28.3333	45	10	58.3333	10	71.6667	10	61.6667	11.6667	63.3333		1	1	1	0	0	6	0	3	8	2	8	4	8	0	8	5
4.42	WTG	25	50	15	58.3333	11.6667	73.3333	6.66667	80	16.6667	35	13.3333	38.3333	15	38.3333	20	46.6667		0	3	0	4	0	10	0	16	8	1	8	3	8	3	7	5
4.19	WTG	30	20	10	31.6667	11.6667	48.3333	13.3333	23.3333	13.3333	51.6667	8.33333	26.6667	18.3333	18.3333	6.66667	21.6667		0	4	0	3	1	7	0	6	5	1	2	4	8	0	7	11
4.53	WTG	35	46.6667	21.6667	65	13.3333	66.6667	11.6667	70	21.6667	51.6667	21.6667	50	18.3333	61.6667	55	28.3333		0	2	0	8	1	11	0	15	8	3	7	3	8	14	8	2
4.83	WTG	50	28.3333	31.6667	43.3333	20	40	11.6667	65	10	46.6667	13.3333	48.3333	15	50	16.6667	33.3333		2	5	0	8	0	6	0	13	8	4	8	4	8	7	8	7
5.49	WTG	16.6667	30	3.33333	21.6667	10	58.3333	11.6667	51.6667	15	55	20	35	23.3333	40	11.6667	48.3333		0	2	0	1	0	8	0	9	8	3	8	2	8	8	7	10
5.16	WTG	23.3333	25	15	55	15	45	8.33333	71.6667	6.66667	13.3333	5	1.66667	6.66667	18.3333	11.6667	11.6667		0	5	0	6	0	6	0	11	8	2	8	2	8	2	7	5
5.1	WTG	36.6667	18.3333	21.6667	48.3333	20	53.3333	8.33333	73.3333	8.33333	50	21.6667	43.3333	13.3333	43.3333	16.6667	50		4	5	5	2	0	11	0	16	8	4	8	5	8	11	6	13
4.68	WTG	46.6667	33.3333	31.6667	48.3333	28.3333	53.3333	15	73.3333	25	36.6667	40	31.6667	23.3333	58.3333	15	63.3333		3	2	3	7	2	8	2	10	6	1	8	1	8	7	8	6
4.72	WTG	31.6667	41.6667	31.6667	53.3333	25	66.6667	13.3333	70	26.6667	61.6667	16.6667	70	18.3333	71.6667	15	80		2	1	3	9	7	10	0	16	6	4	8	7	7	8	7	16
4.58	WTG	35	36.6667	23.3333	50	6.66667	80	8.33333	53.3333	45	25	43.3333	25	38.3333	36.6667	35	53.3333		0	0	0	0	0	8	0	9	8	2	8	2	8	7	8	5
5.43	WTG	21.6667	56.6667	15	66.6667	11.6667	60	6.66667	85	21.6667	50	26.6667	43.3333	21.6667	55	23.3333	48.3333		1	7	0	10	0	10	0	17	8	5	8	6	8	9	8	8
5.46	WTG	23.3333	60	8.33333	75	10	53.3333	10	60	26.6667	45	20	50	20	40	25	38.3333		0	6	0	10	0	11	0	15	8	1	7	9	7	3	8	4
4.71	WTG	55	35	30	56.6667	31.6667	56.6667	38.3333	51.6667	40	46.6667	45	31.6667	40	33.3333	46.6667	33.3333		0	2	0	0	0	4	0	1	8	1	8	1	8	4	7	1
5.25	WTG	25	55	11.6667	60	36.6667	25	20	60	21.6667	21.6667	25	33.3333	16.6667	46.6667	28.3333	15		0	4	0	9	0	3	0	19	8	0	8	5	8	7	7	3
4.75	WTG	31.6667	46.6667	15	53.3333	20	68.3333	10	70	21.6667	51.6667	10	56.6667	20	48.3333	18.3333	63.3333		0	6	0	8	0	11	0	13	8	0	7	7	8	3	8	7
5.18	WTG	16.6667	23.3333	16.6667	21.6667	23.3333	25	5	36.6667	8.33333	48.3333	1.66667	31.6667	15	21.6667	8.33333	21.6667		0	0	0	0	1	2	0	1	7	0	8	4	7	0	8	4
5.57	WTG	16.6667	31.6667	13.3333	21.6667	10	41.6667	3.33333	43.3333	25	16.6667	30	18.3333	30	25	25	20		0	0	0	0	1	3	0	3	8	0	8	0	8	0	8	1
5.92	WTG	20	10	30	18.3333	40	20	16.6667	23.3333	20	30	18.3333	18.3333	18.3333	25	23.3333	13.3333		1	0	0	1	0	1	1	2	8	0	7	1	7	0	7	0
6.51	WTG	25	58.3333	28.3333	51.6667	13.3333	61.6667	6.66667	76.6667	26.6667	20	15	76.6667	18.3333	58.3333	28.3333	56.6667		0	8	1	9	0	12	0	17	7	0	6	7	8	5	8	15
7.35	WTG	35	30	50	21.6667	21.6667	43.3333	8.33333	71.6667	18.3333	53.3333	35	33.3333	25	30	20	48.3333		0	1	1	0	0	6	0	13	8	1	8	4	8	0	8	0
5.87	WTG	40	30	36.6667	35	15	66.6667	26.6667	60	18.3333	55	30	26.6667	13.3333	28.3333	28.3333	26.6667		2	3	3	10	2	12	1	20	8	5	8	2	8	0	7	2
6.4	WTG	30	46.6667	28.3333	48.3333	16.6667	68.3333	6.66667	76.6667	10	66.6667	10	60	11.6667	71.6667	13.3333	71.6667		4	3	1	8	4	12	1	11	8	2	8	9	6	11	8	18
5.85	WTG	38.3333	40	35	40	15	55	26.6667	61.6667	25	55	26.6667	41.6667	18.3333	53.3333	25	58.3333		3	7	3	5	3	11	2	12	8	8	8	9	8	12	7	18
5.75	WTG	38.3333	41.6667	15	53.3333	20	56.6667	28.3333	50	11.6667	63.3333	16.6667	40	10	66.6667	6.66667	65		4	1	2	6	0	6	2	9	8	1	8	8	8	7	7	6
5.52	WTG	20	68.3333	6.66667	75	6.66667	76.6667	0	91.6667	28.3333	58.3333	18.3333	60	21.6667	56.6667	13.3333	70		5	6	0	10	0	14	0	18	8	7	8	9	7	11	8	16
5.81	WTG	16.6667	56.6667	21.6667	50	10	63.3333	6.66667	78.3333	35	35	31.6667	38.3333	31.6667	43.3333	28.3333	51.6667		0	5	2	5	0	9	0	10	8	1	8	1	8	4	7	4
6.1	WTG	31.6667	61.6667	33.3333	63.3333	15	80	11.6667	85	25	68.3333	23.3333	71.6667	13.3333	81.6667	15	73.3333		4	3	1	7	1	12	3	19	7	6	8	5	8	11	7	12
7.41	WTG	41.6667	41.6667	6.66667	81.6667	20	65	10	80	21.6667	65	21.6667	61.6667	10	71.6667	6.66667	73.3333		3	1	0	9	0	11	1	20	6	6	8	9	8	10	7	16
7.28	WTG	16.6667	65	40	50	13.3333	55	13.3333	73.3333	45	23.3333	38.3333	43.3333	28.3333	41.6667	26.6667	61.6667		0	6	6	7	0	13	1	22	8	1	8	9	8	9	8	19
6.13	WTG	40	43.3333	35	31.6667	31.6667	48.3333	21.6667	61.6667	8.33333	41.6667	35	43.3333	20	45	15	50		4	6	2	8	1	12	0	19	8	3	8	8	8	9	8	15
5.68	WTG	26.6667	46.6667	15	66.6667	16.6667	71.6667	15	75	15	50	31.6667	40	18.3333	48.3333	20	66.6667		1	4	0	12	0	15	2	22	8	6	7	9	8	12	8	15
6.88	WTG	26.6667	50	20	53.3333	16.6667	65	8.33333	70	40	31.6667	18.3333	40	15	40	11.6667	45		0	3	0	12	0	10	0	11	7	0	8	8	8	10	6	13
6.96	WTG	41.6667	41.6667	35	25	33.3333	38.3333	10	71.6667	11.6667	68.3333	20	38.3333	10	46.6667	11.6667	65		5	6	0	4	2	6	0	19	6	3	8	6	8	9	7	20
6.15	WTG	46.6667	43.3333	15	81.6667	18.3333	71.6667	6.66667	90	0	95	10	78.3333	23.3333	63.3333	18.3333	76.6667		5	5	1	12	0	14	0	21	7	2	8	10	8	13	8	19
6.64	WTG	15	51.6667	11.6667	76.6667	15	75	8.33333	80	21.6667	61.6667	11.6667	65	21.6667	55	15	70		0	6	0	12	0	16	0	22	8	6	8	10	8	14	8	22
5.52	WTG	8.33333	73.3333	23.3333	48.3333	11.6667	66.6667	3.33333	78.3333	23.3333	26.6667	18.3333	36.6667	18.3333	63.3333	11.6667	65		0	4	0	6	0	7	0	8	8	0	5	2	4	10	2	20

## Sheet: Exp2b
Experiment 2 (two dishes with diferent substrata in a tank)						(Table 5)
		Number of pictures with the fish in the dish (max. 10 per a time interval)
		Treatment 1												Treatment 2												Treatment 3												Treatment 4
	substratum	Dish1						Dish 2						Dish1						Dish 2						Dish1						Dish 2						Dish1						Dish 2
		Sand	Sand	Sand	Sand	Sand	Sand	Dreissena	Dreissena	Dreissena	Dreissena	Dreissena	Dreissena	Sand	Sand	Sand	Sand	Sand	Sand	Dreissena	Dreissena	Dreissena	Dreissena	Dreissena	Dreissena	Sand	Sand	Sand	Sand	Sand	Sand	Dreissena	Dreissena	Dreissena	Dreissena	Dreissena	Dreissena	Sand	Sand	Sand	Sand	Sand	Sand	Dreissena	Dreissena	Dreissena	Dreissena	Dreissena	Dreissena
	food quantity (no. larvae)	8	8	8	8	8	8	8	8	8	8	8	8	8	8	8	8	8	8	12	12	12	12	12	12	8	8	8	8	8	8	16	16	16	16	16	16	8	8	8	8	8	8	24	24	24	24	24	24
	Time interval (min)	10	20	30	40	50	60	10	20	30	40	50	60	10	20	30	40	50	60	10	20	30	40	50	60	10	20	30	40	50	60	10	20	30	40	50	60	10	20	30	40	50	60	10	20	30	40	50	60
Fish size (cm)	Fish species (RG - racer goby, WTG - western tubenose goby)
RG	4.8	6	2	2	2	3	0	1	6	5	5	6	6	2	1	0	2	1	3	5	8	8	6	8	6	1	2	0	2	2	0	7	7	6	7	8	5	2	2	3	0	1	1	7	5	7	6	6	6
RG	5.51	5	0	7	3	6	1	0	3	1	0	0	0	3	6	3	1	10	1	0	0	0	0	0	1	0	0	6	7	8	0	0	0	0	0	0	0	7	4	5	5	6	5	0	1	2	1	1	0
RG	4.47	0	3	0	0	0	0	0	2	0	2	0	5	5	0	0	0	0	0	0	1	6	3	2	1	3	2	0	0	5	1	3	6	8	5	0	4	2	4	1	0	6	1	2	1	6	0	2	0
RG	4.67	5	7	10	7	8	5	0	2	0	0	1	0	9	10	10	10	10	10	0	0	0	0	0	0	9	9	8	10	10	10	0	0	0	0	0	0	4	3	4	1	3	2	3	7	2	7	2	8
RG	5.37	6	7	0	0	0	0	0	0	0	0	0	0	8	4	0	0	0	0	0	0	0	0	0	0	4	4	0	0	0	0	0	0	0	0	0	0	0	1	5	1	10	10	0	0	0	0	0	0
RG	4.78	2	3	0	3	0	0	0	0	0	3	0	0	0	4	0	0	0	0	0	2	4	0	0	0	1	1	4	2	0	0	1	1	3	2	0	0	3	1	0	2	0	0	0	2	3	0	7	0
RG	4.81	4	3	0	0	6	0	0	1	1	0	0	0	4	4	5	2	3	10	1	0	2	1	0	0	7	10	10	10	9	10	0	0	0	0	1	0	6	8	10	9	8	7	0	0	0	0	0	0
RG	5.27	6	10	8	6	6	8	0	0	0	0	0	0	9	3	3	2	5	6	0	4	5	4	1	0	9	7	6	8	1	1	0	0	4	0	0	0	2	9	0	1	10	10	2	0	0	0	0	0
RG	5.36	2	3	0	0	0	0	0	0	0	0	0	0	0	0	0	0	0	0	0	0	0	0	0	0	0	0	4	1	0	0	0	0	0	3	0	0	0	1	0	0	0	0	2	3	1	0	0	0
RG	4	4	2	3	6	1	3	0	0	0	0	0	0	6	4	1	0	2	0	0	0	0	0	0	0	3	5	3	4	1	3	0	0	1	0	0	0	5	3	4	1	3	3	0	1	0	6	1	0
RG	4.74	2	2	0	0	0	0	0	3	1	2	0	2	3	4	0	0	0	0	3	2	1	0	2	0	4	3	1	0	0	0	1	3	4	0	0	0	3	2	3	0	0	2	0	1	2	3	5	7
RG	5.69	2	0	0	0	0	0	5	10	10	10	10	10	0	0	0	0	0	0	0	0	0	0	2	0	0	2	2	0	0	0	3	0	3	0	0	0	1	0	0	1	0	0	4	0	2	0	4	0
RG	5.09	4	4	4	0	1	10	0	1	5	3	1	0	0	0	0	0	0	0	0	0	10	3	0	0	5	7	3	0	10	5	0	1	2	0	0	3	6	3	0	3	2	5	0	5	7	4	6	2
RG	5.53	0	5	4	0	0	0	0	0	0	6	7	6	0	0	0	0	0	3	0	0	0	0	2	0	2	0	0	0	0	0	0	9	3	9	1	0	0	7	0	0	0	0	0	0	9	10	4	0
RG	5.21	0	0	0	1	1	4	0	0	0	0	0	0	0	5	3	0	0	0	0	0	0	0	0	0	1	3	5	6	7	6	0	1	0	1	2	0	0	2	3	5	0	0	0	0	0	0	0	0
RG	5.39	1	0	0	1	2	0	1	0	0	5	1	1	1	1	1	0	0	0	0	2	5	0	1	1	2	0	1	3	0	2	3	8	7	4	5	0	0	2	0	3	3	3	0	1	5	2	2	3
RG	5.16	1	6	0	5	2	0	0	0	0	0	0	0	1	3	2	0	0	0	0	0	1	0	0	0	2	4	0	4	3	3	1	0	2	0	0	0	5	5	1	4	0	0	0	0	1	2	2	0
RG	4.38	0	0	0	4	0	4	0	0	0	3	1	3	0	0	5	0	0	0	0	0	3	1	4	0	1	3	2	0	0	0	0	2	2	8	0	0	0	0	5	3	0	0	0	0	0	4	8	4
RG	6.11	6	2	0	0	0	0	0	0	0	0	0	0	0	0	0	0	3	0	0	0	0	0	0	0	5	5	0	0	0	0	0	0	1	0	0	0	5	6	3	0	1	7	0	0	0	0	0	0
RG	5.34	0	0	0	0	0	0	0	0	0	0	0	0	1	0	0	1	0	0	0	0	2	0	0	0	0	2	0	0	0	0	0	0	0	0	0	0	2	0	0	5	0	0	0	0	0	0	0	0
RG	6.88	0	4	0	0	0	0	2	2	0	0	0	0	0	0	0	0	0	0	0	0	0	0	0	0	0	3	0	2	0	0	1	7	7	3	10	8	2	2	1	1	0	0	0	8	8	9	7	0
RG	7.2	2	2	0	0	3	0	0	0	0	0	0	0	1	2	0	0	0	0	0	1	2	0	1	1	2	1	4	0	0	0	0	3	0	1	0	0	2	2	0	1	0	0	1	5	0	4	5	2
RG	5.43	0	0	0	0	0	0	0	0	0	0	0	0	0	0	0	0	0	0	0	0	0	0	0	0	0	2	1	0	0	0	0	0	0	0	0	0	0	2	1	0	6	0	0	1	5	1	0	0
RG	6.87	2	3	2	1	4	4	1	2	0	0	0	1	2	3	2	0	1	0	3	3	2	5	4	2	1	2	1	0	0	1	1	2	6	4	5	5	3	1	2	0	0	2	4	6	4	6	6	2
RG	5.65	1	3	2	2	0	4	6	6	5	5	3	3	1	1	2	0	5	0	2	4	4	5	3	3	1	1	1	2	2	0	3	5	8	6	5	4	3	1	3	4	1	0	4	8	5	4	6	3
RG	8.4	3	7	6	8	8	6	0	0	0	0	0	0	2	0	0	2	1	2	6	10	7	0	0	0	1	2	0	0	4	2	7	5	9	7	0	4	3	3	2	0	2	5	3	1	6	9	8	1
RG	6.38	2	0	0	0	0	2	2	5	3	3	3	2	1	0	1	0	2	0	0	2	2	3	3	3	1	1	1	1	4	2	2	6	7	8	5	5	2	2	2	0	0	0	2	6	1	3	6	3
RG	6.78	0	1	3	0	0	0	5	0	3	2	2	0	1	1	0	2	1	2	6	3	3	4	7	4	2	4	2	1	2	1	4	6	5	5	7	4	0	0	0	1	6	0	7	9	8	5	3	4
RG	7.38	1	3	1	2	5	4	4	6	8	4	3	4	1	1	1	0	3	2	4	8	6	6	4	5	1	3	2	1	0	1	6	3	7	5	10	7	2	2	1	0	0	1	2	3	9	6	9	5
RG	5.97	0	6	5	3	2	3	2	2	1	0	8	1	4	3	2	4	2	1	1	3	2	1	6	4	7	4	3	2	2	1	0	6	6	4	4	6	3	1	3	1	1	1	2	5	3	3	4	0
RG	6.66	3	0	2	2	0	0	2	0	2	0	1	4	3	0	2	0	0	0	0	1	1	0	0	0	0	1	1	0	3	2	0	4	4	2	2	1	0	1	1	0	2	0	2	2	5	6	5	4
RG	5.21	1	4	1	2	1	2	2	2	4	5	7	3	4	2	1	0	5	1	2	3	1	0	3	1	2	2	1	1	1	1	2	3	4	6	7	6	1	0	3	1	0	0	0	3	3	5	7	3
RG	6.2	2	2	4	6	3	3	3	1	0	0	3	2	2	2	1	0	0	0	0	1	4	3	3	2	1	0	0	1	1	0	5	5	4	5	5	2	2	2	4	2	1	2	0	6	3	6	6	5
RG	7.83	2	3	2	1	2	3	0	6	4	5	6	5	4	2	4	3	4	3	1	6	1	2	4	1	2	2	5	2	3	1	3	3	5	5	5	5	1	3	3	4	5	3	5	4	4	5	2	4
RG	6.84	2	0	1	5	1	5	0	1	4	2	0	2	0	2	0	0	1	0	0	2	1	2	0	0	0	3	1	2	1	1	1	1	7	5	3	4	3	0	0	2	0	0	0	4	5	6	4	2
WTG	5.57	8	1	1	3	2	0	0	0	4	4	2	0	7	2	1	3	5	0	1	4	2	3	1	0	5	6	1	3	1	2	1	3	5	2	2	2	6	0	2	2	5	0	1	0	2	3	2	4
WTG	5.92	2	3	0	3	1	3	2	4	5	3	2	2	5	1	0	2	0	3	1	2	3	4	0	1	4	1	2	1	0	3	2	1	3	5	1	3	5	2	1	2	3	1	1	1	4	2	0	0
WTG	6.51	5	3	1	0	1	6	1	4	0	0	5	2	0	2	6	0	1	0	9	7	3	10	8	9	5	2	2	0	2	0	2	4	8	8	6	7	3	4	4	0	0	6	5	2	4	10	10	3
WTG	7.35	3	0	3	0	4	1	3	8	5	6	4	6	6	2	7	3	2	1	1	8	0	5	5	1	5	3	2	4	1	0	2	3	5	4	4	0	3	3	1	1	3	1	4	7	5	6	4	3
WTG	5.87	3	0	4	3	0	1	4	7	5	4	10	3	6	3	2	2	0	5	1	5	6	4	0	0	3	1	0	3	0	1	2	6	1	1	1	6	0	8	3	5	0	1	6	0	0	0	6	4
WTG	6.4	2	0	1	1	1	1	7	9	5	7	5	7	0	1	0	1	2	2	5	6	7	7	6	5	2	0	1	1	3	0	6	8	7	8	4	10	2	3	0	1	1	1	6	6	9	5	8	9
WTG	5.85	4	2	4	1	4	0	3	8	3	7	3	9	2	2	1	4	5	2	3	2	8	4	1	7	4	0	1	2	1	3	3	7	4	4	9	5	5	4	1	1	3	1	2	3	9	8	5	8
WTG	5.75	2	2	0	2	1	0	2	5	8	4	9	10	0	3	0	3	4	0	4	5	6	4	5	0	3	0	0	2	0	1	2	8	6	6	10	8	0	1	1	1	1	0	1	7	7	9	8	7
WTG	5.52	0	3	2	3	0	9	9	5	5	7	9	0	2	2	2	0	3	2	5	5	8	8	6	4	1	2	3	2	1	4	7	6	3	6	9	3	0	3	1	0	1	3	6	6	7	9	8	6
WTG	5.81	3	1	7	2	5	3	3	7	0	6	1	4	2	3	3	1	2	8	1	1	6	8	5	2	4	5	2	1	3	4	2	3	7	8	4	2	2	2	3	3	2	5	6	5	7	4	6	3
WTG	6.1	2	1	9	0	2	1	6	9	1	10	8	7	5	6	2	1	0	0	4	3	8	9	9	10	3	2	0	0	1	2	7	8	10	9	8	7	4	1	1	0	1	2	6	8	7	8	9	6
WTG	7.41	5	1	2	1	2	2	4	8	6	7	8	6	4	0	1	3	1	4	1	10	9	7	7	3	3	0	2	0	1	0	3	10	7	7	7	9	1	0	2	0	1	0	6	9	7	8	7	7
WTG	7.28	6	3	3	3	7	5	0	3	5	4	0	2	2	3	5	3	2	8	3	6	4	6	7	0	2	5	3	3	2	2	5	4	4	5	4	3	4	1	2	5	0	4	6	9	7	3	9	3
WTG	6.13	1	1	1	0	0	2	3	2	6	9	5	0	4	5	1	3	5	3	4	3	8	5	3	3	3	4	1	1	2	1	3	3	7	4	4	6	3	1	0	1	3	1	4	4	6	6	5	5
WTG	5.68	0	0	3	0	5	1	8	9	3	4	2	4	2	6	2	0	6	3	0	4	6	8	3	3	4	1	1	5	0	0	1	5	5	3	9	6	5	2	3	1	0	1	1	7	6	9	10	7
WTG	6.88	0	6	6	6	3	3	1	4	2	3	7	2	4	3	2	0	1	1	0	3	3	5	8	5	4	2	3	0	0	0	0	5	7	10	0	2	3	1	1	0	2	0	0	5	5	7	3	7
WTG	6.96	2	0	0	3	1	1	2	7	10	7	8	7	2	3	3	2	2	0	4	3	4	0	3	9	3	2	0	0	1	0	3	8	9	8	0	0	1	2	1	0	0	3	5	8	8	9	6	3
WTG	6.15	0	0	0	0	0	0	8	10	9	10	10	10	2	0	1	1	0	2	7	9	6	9	10	6	2	1	1	1	3	6	8	9	8	7	5	1	3	1	1	1	5	0	7	9	9	9	3	9
WTG	6.64	2	0	4	3	2	2	5	9	6	6	5	6	2	1	0	2	0	2	6	7	9	5	6	6	3	0	1	0	4	5	4	8	7	5	4	5	3	2	1	2	1	0	4	7	9	6	7	9
WTG	5.52	2	2	4	2	2	2	0	5	1	2	4	4	2	1	3	3	1	1	0	8	4	2	4	4	4	2	2	2	1	0	4	7	6	4	7	10	0	2	2	0	3	0	2	7	8	9	7	6
WTG	3.69	0	5	0	4	2	1	1	2	7	3	4	1	4	2	3	2	1	0	3	5	2	1	2	5	5	2	1	3	0	2	0	5	2	0	4	3	3	3	0	2	0	2	0	5	3	3	0	1
WTG	4.56	0	5	0	4	2	1	1	2	7	3	4	1	3	1	2	0	0	5	3	4	4	10	7	4	2	3	0	2	0	0	3	6	10	6	0	10	5	1	0	1	0	0	3	5	5	5	10	7
WTG	5.07	4	2	2	0	2	0	1	1	6	3	3	3	3	2	1	0	0	0	3	6	8	10	6	10	2	1	1	0	2	0	3	8	6	6	6	8	4	0	2	0	1	0	3	8	8	7	6	6
WTG	4.42	5	0	0	0	1	0	5	9	6	5	6	4	3	3	0	1	0	1	0	1	6	1	8	7	5	2	0	1	1	0	0	6	4	0	7	6	5	3	1	1	0	2	1	4	4	7	6	6
WTG	4.19	0	0	6	2	0	2	6	0	0	5	7	3	0	2	2	1	0	0	1	6	0	0	6	3	0	4	0	4	1	2	0	2	0	0	2	7	0	1	1	0	2	0	0	0	6	5	0	2
WTG	4.53	1	3	1	1	2	0	2	5	8	0	7	9	3	3	3	3	1	0	3	5	6	5	4	7	2	4	2	0	3	0	5	3	5	9	5	10	2	2	10	10	5	4	3	6	0	0	4	4
WTG	4.83	2	1	7	2	1	0	7	3	3	6	4	8	3	4	0	1	0	0	1	4	6	5	9	4	3	1	1	0	2	2	3	8	5	10	2	2	0	6	2	1	1	0	3	3	6	3	3	2
WTG	5.49	2	0	2	0	2	0	0	10	6	5	6	1	1	2	2	2	1	4	3	3	4	5	5	1	4	3	3	2	1	1	1	4	1	6	4	8	3	0	1	0	2	1	2	8	8	3	3	5
WTG	5.16	1	5	0	1	0	2	2	2	8	7	7	7	1	1	0	0	1	0	0	0	1	0	0	0	1	2	1	0	0	0	0	2	1	5	0	3	1	5	0	0	1	0	0	1	1	1	2	2
WTG	5.1	0	1	2	0	1	0	0	2	0	2	0	4	4	2	2	0	2	3	1	4	5	9	4	3	2	1	2	1	1	1	3	5	3	6	4	5	2	2	4	1	1	0	2	6	4	8	6	4
WTG	4.68	2	1	0	1	1	0	3	4	10	4	3	6	3	8	2	4	0	7	2	0	2	4	9	2	4	4	0	2	0	4	5	4	9	3	10	4	3	2	1	1	2	0	7	5	7	8	7	4
WTG	4.72	4	4	3	1	2	1	0	0	5	7	7	3	5	1	0	1	3	0	2	8	9	8	5	10	2	5	0	1	2	1	6	4	9	9	7	8	5	0	0	2	0	2	4	10	10	7	10	7
WTG	4.58	7	1	2	0	2	4	1	9	8	10	5	4	8	1	4	2	6	5	0	8	3	4	0	0	5	1	2	6	6	3	3	7	6	3	0	3	3	8	4	2	1	3	6	2	4	7	8	5
WTG	5.43	6	0	5	1	10	5	0	9	0	2	0	4	2	6	0	3	4	1	7	2	7	4	4	2	4	1	3	2	0	3	3	6	6	4	9	5	3	3	3	2	2	1	0	6	6	8	3	6
WTG	5.46	0	0	2	6	1	4	5	6	6	0	9	4	0	6	3	1	1	1	8	4	3	5	4	6	3	2	2	3	2	0	1	7	6	3	4	3	3	5	3	3	1	0	0	2	7	3	3	8
WTG	4.71	2	5	4	1	2	2	3	4	4	7	5	4	7	7	0	5	2	6	0	0	9	4	5	1	4	4	5	7	2	2	1	5	3	0	4	7	2	4	6	7	6	3	8	2	3	3	0	4
WTG	5.25	6	3	4	4	7	0	4	6	3	4	2	9	6	2	2	2	2	1	0	6	7	2	4	1	5	2	1	1	1	0	1	7	7	6	4	3	0	3	2	2	9	1	2	4	1	0	0	2
WTG	4.75	2	6	3	1	0	1	0	1	4	0	4	4	2	1	0	3	0	0	4	6	7	5	10	2	3	2	2	0	2	3	1	7	5	10	3	3	4	0	1	2	4	0	5	9	6	6	3	9
WTG	5.18	5	2	0	2	1	3	2	6	7	6	3	7	1	0	0	0	0	0	1	6	4	2	4	2	0	4	1	0	1	3	0	4	4	2	0	3	0	3	0	0	2	0	0	3	2	1	7	0
